# Supplementary material for: Interaction between Crustal-Scale Darcy and Hydrofracture Fluid Transport: A Numerical Study
Source: Hindawi journal article supplement (doi:10.1155/2020/8891801), 2020-11-05
Supplement: f1 [file 8891801.f1.zip]

Archive with 8 entries (8 files):
- 1_D0.mp4
- 10_D0.mp4
- 100_D0.mp4
- 100_D1e-4.mp4
- 100_D2e-5.mp4
- 100_D2e-6.mp4
- 100_D2e-9.mp4
- 100_D6e-5.mp4
